# Supplementary material
Source: publisher site journal article supplement (https://www.dovepress.com/article/459987)
Supplement: Supplementary file 1 [file get_supplementary_file.php]

**Appendix 1. PRISMA-ScR Checklist**

PRISMA Extension for Scoping Reviews Checklist is taken from [25].

| **SECTION** | **ITEM** | **PRISMA-ScR CHECKLIST ITEM** | **REPORTED ON section title** |
| --- | --- | --- | --- |
| **TITLE** | | | |
| Title | 1 | Identify the report as a scoping review. | Title on page 1 |
| **ABSTRACT** | | | |
| Structured summary | 2 | Provide a structured summary that includes (as applicable): background, objectives, eligibility criteria, sources of evidence, charting methods, results, and conclusions that relate to the review questions and objectives. | Abstract on page 1 |
| **INTRODUCTION** | | | |
| Rationale | 3 | Describe the rationale for the review in the context of what is already known. Explain why the review questions/objectives lend themselves to a scoping review approach. | Subsection Rationale |
| Objectives | 4 | Provide an explicit statement of the questions and objectives being addressed with reference to their key elements (e.g., population or participants, concepts, and context) or other relevant key elements used to conceptualize the review questions and/or objectives. | Subsection Objectives |
| **METHODS** | | | |
| Protocol and registration | 5 | Indicate whether a review protocol exists; state if and where it can be accessed (e.g., a Web address); and if available, provide registration information, including the registration number. | Not registered |
| Eligibility criteria | 6 | Specify characteristics of the sources of evidence used as eligibility criteria (e.g., years considered, language, and publication status), and provide a rationale. | Section Methods |
| Information sources | 7 | Describe all information sources in the search (e.g., databases with dates of coverage and contact with authors to identify additional sources), as well as the date the most recent search was executed. | Section Methods |
| Search | 8 | Present the full electronic search strategy for at least 1 database, including any limits used, such that it could be repeated. | Appendix 2 |
| Selection of sources of evidence | 9 | State the process for selecting sources of evidence (i.e., screening and eligibility) included in the scoping review. | Section Methods |
| Data charting process | 10 | Describe the methods of charting data from the included sources of evidence (e.g., calibrated forms or forms that have been tested by the team before their use, and whether data charting was done independently or in duplicate) and any processes for obtaining and confirming data from investigators. | Section Methods |
| Data items | 11 | List and define all variables for which data were sought and any assumptions and simplifications made. | Appendix 3 |
| Critical appraisal of individual sources of evidence | 12 | If done, provide a rationale for conducting a critical appraisal of included sources of evidence; describe the methods used and how this information was used in any data synthesis (if appropriate). | X |
| Synthesis of results | 13 | Describe the methods of handling and summarizing the data that were charted. | Section Methods |
| **RESULTS** | | | |
| Selection of sources of evidence | 14 | Give numbers of sources of evidence screened, assessed for eligibility, and included in the review, with reasons for exclusions at each stage, ideally using a flow diagram. | Subsection Study selection |
| Characteristics of sources of evidence | 15 | For each source of evidence, present characteristics for which data were charted and provide the citations. | Subsection Study characteristics |
| Critical appraisal within sources of evidence | 16 | If done, present data on critical appraisal of included sources of evidence (see item 12). | X |
| Results of individual sources of evidence | 17 | For each included source of evidence, present the relevant data that were charted that relate to the review questions and objectives. | Subsection Description of included studies, and Appendix 3 |
| Synthesis of results | 18 | Summarize and/or present the charting results as they relate to the review questions and objectives. | Subsection Objectives, and Description of included studies |
| **DISCUSSION** | | | |
| Summary of evidence | 19 | Summarize the main results (including an overview of concepts, themes, and types of evidence available), link to the review questions and objectives, and consider the relevance to key groups. | Section Discussion |
| Limitations | 20 | Discuss the limitations of the scoping review process. | Subsection Limitations |
| Conclusions | 21 | Provide a general interpretation of the results with respect to the review questions and objectives, as well as potential implications and/or next steps. | Subsection Conclusions |
| **FUNDING** | | | |
| Funding | 22 | Describe sources of funding for the included sources of evidence, as well as sources of funding for the scoping review. Describe the role of the funders of the scoping review. | Subsection Funding |

**Appendix 2. Search Strategies**

| **Web of Science** | | |
| --- | --- | --- |
|  | **Area of search** | **Search string** |
| 1 | Title | IoMT (Title) and security (Title) and framework (Title) |
| 2 | Abstract | IoMT (Abstract) and security (Abstract) and framework (Abstract) |
| 3 | Abstract | IoMT (Abstract) and risk (Abstract) and assessment (Abstract) |
| 4 | Title | IoMT (Title) and risk (Title) and assessment (Title) |
| 5 | Title | IoMT (Title) and risk (Title) and management (Title) |
| 6 | Abstract | IoMT (Abstract) and risk (Abstract) and assessment (Abstract) |
| 7 | Title | IoT (Title) and security (Title) and framework (Title) and healthcare (Title) |
| 8 | Abstract | IoT (Abstract) and security (Abstract) and framework (Abstract) and healthcare (Abstract) |
| 9 | Title | IoT (Title) and risk (Title) and assessment (Title) and healthcare (Title) |
| 10 | Abstract | IoT (Abstract) and risk (Abstract) and assessment (Abstract) and healthcare (Abstract) |
| 11 | Title | IoT (Title) and risk (Title) and management (Title) and healthcare (Title) |
| 12 | Abstract | IoT (Abstract) and risk (Abstract) and management (Abstract) and healthcare (Abstract) |
|  |  |  |
| **Scopus** | | |
|  | **Area of search** | **Search string** |
| 1 | Title | (TITLE (iomt) AND TITLE (security) AND TITLE (framework)) |
| 2 | Abstract | (ABSTRACT (iomt) AND ABSTRACT (security) AND ABSTRACT (framework)) |
| 3 | Abstract | (ABSTRACT (iomt) AND ABSTRACT (risk) AND ABSTRACT (assessment)) |
| 4 | Title | (TITLE (iomt) AND TITLE (risk) AND TITLE (assessment)) |
| 5 | Title | (TITLE (iomt) AND TITLE (risk) AND TITLE (management)) |
| 6 | Abstract | (ABSTRACT (iomt) AND ABSTRACT (risk) AND ABSTRACT (management)) |
| 7 | Title | (TITLE (iot) AND TITLE (security) AND TITLE (framework) AND TITLE (healthcare)) |
| 8 | Abstract | (ABSTRACT (iot) AND ABSTRACT (security) AND ABSTRACT (framework) AND ABSTRACT (healthcare)) |
| 9 | Title | (TITLE (iot) AND TITLE (risk) AND TITLE (assessment) AND TITLE (healthcare)) |
| 10 | Abstract | (ABSTRACT (iot) AND ABSTRACT (risk) AND ABSTRACT (assessment) AND ABSTRACT (healthcare)) |
| 11 | Title | (TITLE (iot) AND TITLE (risk) AND TITLE (management) AND TITLE (healthcare) |
| 12 | Abstract | (ABSTRACT (iot) AND ABSTRACT (risk) AND ABSTRACT (management) AND ABSTRACT (healthcare)) |

**Appendix 3. Summary of included frameworks**

The following articles were searched for security and privacy concerns according to the division presented by Karie et al. [6].

**Part 1**

| **Article** | **Author, year, country** | **Research question** | **1. Framework for risk assessment and management** | **1.1 Limitation to a specific threat** | **1.2 Privacy concern** | **2. Framework for assessing the security level** | **2.1 Assessment of the current IoMT environment** | **2.2 Evaluation of possible IoMT acquisition alternatives** | **Assessment of organisational measures** |
| --- | --- | --- | --- | --- | --- | --- | --- | --- | --- |
| A Comprehensive Study of Security and Cyber-Security Risk Management within e-Health Systems: Synthesis, Analysis and a Novel Quantified Approach | Ksibi et al., 2022, Tunisia | 1 | Yes | Not limited. Addresses device, network, storage and processing levels. | Not mentioned | No | No | No | No |
| A Lightweight Replay Attack Detection Framework for Battery Depended IoT Devices Designed for Healthcare | Rughoobur and Nagowah, 2018, Mauritius | 1 | Yes | Replay attacks | Not mentioned | No | No | No | No |
| A Novel Experience-Driven and Federated Intelligent Threat-Defense Framework in IoMT | Tahir et al., 2023, Pakistan | 1 | Yes | Threat of False Data Injection Attacks (FDIA) at the device (sensor) level | Yes | No | No | No | No |
| A privacy-aware framework for detecting cyber attacks on internet of medical things systems using data fusion and quantum deep learning | Al-Hawawreh and Hossain, 2023, Australia | 1 | Yes | Intrusion detection | Yes | No | No | No | No |
| A Secure Ensemble Learning-Based Fog-Cloud Approach for Cyberattack Detection in IoMT | Khan et al., 2023, Pakistan | 1 | Yes | Intrusion detection | Not mentioned | No | No | No | No |
| An Edge – IoT Framework and Prototype based on Blockchain for Smart Healthcare Applications | Al-Shammari et al., 2021, Saudi Arabia | 1 | Yes | Intrusion detection | Not mentioned | No | No | No | No |
| An Effective Self-Configurable Ransomware Prevention Technique for IoMT | Tariq et al., 2022, Saudi Arabia | 1 | Yes | Ransomware prevention | Not mentioned | No | No | No | No |
| An Efficient Intrusion Detection Framework for Industrial Internet of Things Security | Alshathri et al., 2023, Saudi Arabia | 1 | Yes | Intrusion detection | Not mentioned | No | No | No | No |
| Applied Layered-Security Model to IoMT | Rizk et al., 2019, USA | 1 | Yes | Not limited | Not mentioned | No | No | No | No |
| Augmenting IoT Healthcare Security and Reliability with Early Detection of IoT Botnet Attacks | Kumar and Sharma, 2023b, India | 1 | Yes | Botnet attacks | Not mentioned | No | No | No | No |
| BFT-IoMT: A Blockchain-Based Trust Mechanism to Mitigate Sybil Attack Using Fuzzy Logic in the Internet of Medical Things | Ali et al., 2023, Pakistan | 1 | Yes | Sybil attacks | Not mentioned | No | No | No | No |
| BIOCAD: Bio-Inspired Optimization for Classification and Anomaly Detection in Digital Healthcare Systems | Haque et al., 2021, USA | 1 | Yes | Anomaly detection | Not mentioned | No | No | No | No |
| Blockchain-based Federated Learning with SMPC Model Verification Against Poisoning Attack for Healthcare Systems | Kalapaaking et al., 2023, Australia | 1 | Yes | Poisoning attacks | Yes | No | No | No | No |
| Cognitive Cybersecurity for CPS-IoT Enabled Healthcare Ecosystems | Abie, 2019, Norway | 1 | Yes | Cyberattacks | Yes | No | No | No | No |
| DeepCAD: A Stand-alone Deep Neural Network-based Framework for Classification and Anomaly Detection in Smart Healthcare Systems | Haque et al., 2022, USA | 1 | Yes | Anomaly detection | Not mentioned | No | No | No | No |
| DeepDDoS: A Deep-Learning Model for Detecting Software Defined Healthcare IoT Networks Attacks | Bassene and Gueye, 2021, Senegal | 1 | Yes | Intrusion detection (DoS, DDoS attacks) | Not mentioned | No | No | No | No |
| Detection and Mitigation of Man-in-the-Middle Attack in IoT through Alternate Routing | Saritha et al., 2022, India | 1 | Yes | Man-in-the-middle attacks | Not mentioned | No | No | No | No |
| Embedded policing and policy enforcement approach for future secure IoT technologies | Siddiqui et al., 2018, UK | 1 | Yes | Not limited | Not mentioned | No | No | No | No |
| Enabling Security Services in Socially Assistive Robot Scenarios for Healthcare Applications | Vulpe et al., 2021, Romania | 1 | Yes | Not limited. Addresses security threats of each layer | Not mentioned | No | No | No | No |
| Enhancing Data Privacy of IoT Healthcare with Keylogger Attack Mitigation | Kumar and Sharma, 2023, India | 1 | Yes | Keylogger detection | Yes | No | No | No | No |
| Extreme learning machine and bayesian optimization‑driven intelligent framework for IoMT cyber‑attack detection | Nayak et al., 2022, India | 1 | Yes | Not limited. Cyber attacks. | Yes | No | No | No | No |
| Hybrid dual-channel convolution neural network (DCCNN) with spider monkey optimization (SMO) for cyber security threats detection in internet of things | Vijayalakshmi and Karthika, 2023, India | 1 | Yes | Malware and pirate software | Not mentioned | No | No | No | No |
| IDS-Chain: A Collaborative Intrusion Detection Framework Empowered Blockchain for Internet of Medical Things | Aljuhani, 2022, Saudi Arabia | 1 | Yes | Intrusion detection | Yes | No | No | No | No |
| Improved Wireless Medical Cyber-Physical System (IWMCPS) Based on Machine Learning | Alzahrani et al., 2023, Saudi Arabia | 1 | Yes | Not limited. Including data modification, denial of service (DOS) and data injection | Not mentioned | No | No | No | No |
| Mitigating the Impact of IoT Routing Attacks on Power Consumption in IoT Healthcare Environment using Convolutional Neural Network | Kamel and Elhamayed, 2020, Egypt | 1 | Yes | IoT routing attacks with impact on energy consumption | Not mentioned | No | No | No | No |
| MODSC: Many-objective Optimization-driven Data-balancing Strategy in Cross-Architectural Malware Classification for Extreme IoT | Cui et al., 2023, China | 1 | Yes | Malware detection | Not mentioned | No | No | No | No |
| PHASE: Security Analyzer for Next-Generation Smart Personalized Smart Healthcare System | Haque and Rahman, 2022, USA | 1 | Yes | Threat of tampering with measurements at the device (sensor) level | Not mentioned | No | No | No | No |
| Resilient Security Framework Using TNN and Blockchain for IoMT | Alsemmeari et al., 2023, Saudi Arabia | 1 | Yes | Cyberattacks. Malicious data from medical sensors (data injection). | Not mentioned | No | No | No | No |
| Security as solution: An Intrusion Detection System Using a Neural Network For IoT Enabled Healthcare Ecosystem | Jain et al., 2021, India | 1 | Yes | Intrusion detection and prevention of intrusion | Not mentioned | No | No | No | No |
| Towards a Novel Framework for Reinforcing Cybersecurity using Digital Twins in IoT-based Healthcare Applications | Pirbhulal et al., 2022, Norway | 1 | Yes | Not limited | Not mentioned | No | No | No | No |
| Trustworthy Intrusion Detection in E-Healthcare Systems | Akram et al., 2021, China | 1 | Yes | Intrusion detection | Not mentioned | No | No | No | No |
| TSDroid: A Novel Android Malware Detection Framework Based on Temporal & Spatial Metrics in IoMT | Zhang et al., 2023, China | 1 | Yes | Malware (Android) | Not mentioned | No | No | No | No |
| A Framework for Representing Internet of things security and privacy policies and detecting potential problems | Opara et al., 2022, USA | 2 | No | x | Yes | Yes | Yes | No | No |
| Combining Secure System Design with Risk Assessment for IoT Healthcare Systems | Kammuller, 2019, UK | 2 | No | x | Yes | Yes | Yes | No | No |
| IoMT-SAF: Internet of Medical Things Security Assessment Framework | Alsubaei et al., 2019, USA | 2 | No | x | Yes | Yes | Yes | Yes | No |
| IoT cyber risk: a holistic analysis of cyber risk assessment frameworks, risk vectors, and risk ranking process | Kandasamy et al., 2020, India | 2 | No | x | Yes | Yes | Yes | No | No |
| IOT SECURITY RISK MANAGEMENT MODEL FOR HEALTHCARE INDUSTRY | Salih et al., 2019, Malaysia | 2 | No | x | Yes | Yes | Yes | No | No |
| IoT Security Risk Management Model for Secured Practice in Healthcare Environment | Zakaria et al., 2019, Malaysia | 2 | No | x | Yes | Yes | Yes | No | No |
| ISA Evaluation Framework for Security of Internet of Health Things System Using AHP-TOPSIS Methods | Wang et al., 2020, China | 2 | No | x | Not mentioned | Yes | No | Yes | No |
| Novel Multi Security and Privacy Benchmarking Framework for Blockchain-Based IoT Healthcare Industry 4.0 Systems | Qahtan et al., 2022, Malaysia | 2 | No | x | Yes | Yes | Yes | No | No |
| The internet of things in healthcare: an overview, challenges and model plan for security risks management process | Bakar et al., 2019, Malaysia | 2 | No | x | Not mentioned | Yes | Yes | No | No |
| Threat and Risk Management Framework for eHealth IoT Applications | Tomashchuk, 2020, Netherlands | 2 | No | x | Yes | Yes | Yes | No | No |
| Towards a Framework for Testing the Security of IoT Devices Consistently | Lally and Sgandurra, 2018, UK | 2 | No | x | Not mentioned | Yes | No | Yes (evaluation) | No |
| Cyber-Risk Management within IoMT: a Context-aware Agent-based Framework for a Reliable e-Health System | Ksibi et al., 2021, Tunisia | 1;2 | Yes | Not limited. Addresses device, network, storage and processing levels. | Not mentioned | Yes | Yes | Yes | No |

**Part 2**

| **Article** | **Evaluation** | **Limitation** | **Future work** |
| --- | --- | --- | --- |
| A Comprehensive Study of Security and Cyber-Security Risk Management within e-Health Systems: Synthesis, Analysis and a Novel Quantified Approach | Not mentioned. | The impossibility of predicting all false positive and false negative scenarios. Adjusting thresholds and risk scores is likely to reduce false positives but may lead to false negatives. | Smart management based on artificial intelligence to monitor system function to reduce false negative and false positive reports is planned. |
| A Framework for Representing Internet of things security and privacy policies and detecting potential problems | The framework was not tested in the real system. It was tested on an IoT-based pharmaceutical cold supply chain application. Over 90% ad-hoc policies could be represented using Icerbac. A number of policy errors were detected. | The paper is concerned with Authorization policies, Obligation policies and Delegation policies. | The plan is to include more rules and generalize rules for policy errors. |
| A Lightweight Replay Attack Detection Framework for Battery Depended IoT Devices Designed for Healthcare | The framework was tested with a prototype under different scenarios. The used metrics are reliability, accuracy, complexity, robustness and performance. | The mitigation solution drains the battery, powering the microcontroller twice faster. | The authors suggest future research directions. For example: enhancing the battery rate monitor component by fuzzy logic and neural networks, the framework can be applied to other IoT environments, adaptation for the situation when the battery is charged. |
| A Novel Experience-Driven and Federated Intelligent Threat-Defense Framework in IoMT | Verified by experiments using the MIMIC dataset from PhysioNet. Deep Federated Averaging (DpFedAvg), Federated Averaging (FedAvg), and Optimized Attentive Federated Aggregation (OptFedAA) methods were used for evaluation. The experiments showed an efficient implementation with favourable Detection Accuracy (DA). | Not mentioned. | Not mentioned. |
| A privacy-aware framework for detecting cyber attacks on internet of medical things systems using data fusion and quantum deep learning | Experiments were performed using the WUSTL-EHMS-2020 dataset and ICU dataset (Intensive Care Unit) for validation. For a generation of instances, the IoT-flock tool was used. The privacy of sensitive features was analyzed. The performance of the data fusion and attack detection modules was measured. | The framework was tested using limited privacy parameters. | The authors plan to test the performance under different privacy parameters and use more data sources. Testing with an improved quantum algorithm is planned. |
| A Secure Ensemble Learning-Based Fog-Cloud Approach for Cyberattack Detection in IoMT | The evaluation was performed by using the ToN-IoT dataset. Used metrics are precision, F1 score, accuracy, false alarm rate, and detection rate. | Not mentioned. | Evaluation of the method in an actual fog-cloud environment is planned. More feature selection strategies for optimization will be used. |
| An Edge – IoT Framework and Prototype based on Blockchain for Smart Healthcare Applications | Evaluation was done by experimental setup and throughput and accuracy results. | Not mentioned. | Not mentioned. |
| An Effective Self-Configurable Ransomware Prevention Technique for IoMT | For evaluation experiments with 194 various samples of malware with 46 variants were used. | Not mentioned. | The authors plan to eliminate blind spots, for example, detect next-generation and emerging ransomware threats, bridge security gaps, and scalable system audit logs to gain valuable insights. |
| An Efficient Intrusion Detection Framework for Industrial Internet of Things Security | For evaluation, a new open-source TON dataset was used. Monitored performance metrics were accuracy, precision, recall, and F1-score. | Not mentioned. | Applying different deep learning algorithms is planned. Authors plan investigation of multiclass classification problem for industrial IoT. |
| Applied Layered-Security Model to IoMT | Not mentioned. | Not mentioned. | Not mentioned. |
| Augmenting IoT Healthcare Security and Reliability with Early Detection of IoT Botnet Attacks | The framework was evaluated using metrics (precision, recall, accuracy, F1 score). | Not mentioned. | The authors mentioned the possibility of using deep neural networks to detect IoT botnet attacks. Chips can be trained for other types of attacks. |
| BFT-IoMT: A Blockchain-Based Trust Mechanism to Mitigate Sybil Attack Using Fuzzy Logic in the Internet of Medical Things | For evaluation experiments, Cooja Network Simulator 2.7 was used. Used metrics are isolation delay, detection rate and energy usage. | Not mentioned. | The authors will focus on reducing the network delay and mitigation of other attacks, for example, wormhole, sinkhole, and jamming attacks. |
| BIOCAD: Bio-Inspired Optimization for Classification and Anomaly Detection in Digital Healthcare Systems | The framework was tested using the Pima Indian diabetes dataset, the Parkinson dataset and the University of Queensland vital signs dataset. | The framework assumes that the used dataset contains needed data to define the data patterns. | To solve imperfect performance, a new evaluation is planned with anomaly detection, classification, and optimization models. Training with known attack samples is also planned. |
| Blockchain-based Federated Learning with SMPC Model Verification Against Poisoning Attack for Healthcare Systems | The evaluation used experiments with datasets from Medical MNIST (TissueMNIST and OCTMNIST). | Not mentioned. | The use of blockchain means consuming computational power. Developing approaches to reduce computational and energy resources is needed. Developing a communication-efficient mechanism to make federated learning and SMCP more efficient. |
| Cognitive Cybersecurity for CPS-IoT Enabled Healthcare Ecosystems | Not mentioned. | Not mentioned. | The authors plan to define the details of architecture components and validation. Also, include the human side perspective (such biases). |
| Combining Secure System Design with Risk Assessment for IoT Healthcare Systems | The method was validated on project SUCCES, which monitors Alzheimer´s patients using system architecture with sensors, a cloud-based server, and access via smartphones. Four iterations were performed until a secure system was achieved. | Formal models of blockchain are not available in the Isabelle tool. | Not mentioned. |
| Cyber-Risk Management within IoMT: a Context-aware Agent-based Framework for a Reliable e-Health System | The model evaluation is performed in the case of an attack on an insulin pump. The risk assessment at the device level results in a high value because it has a life-threatening impact. | The model can be extended with additional agents to provide higher granularity. However, care must be taken to balance between granularity and complexity. | Implementation of artificial intelligence algorithms for analysis and correlation between agent outputs. |
| DeepCAD: A Stand-alone Deep Neural Network-based Framework for Classification and Anomaly Detection in Smart Healthcare Systems | Validation was performed on the Pima Indians Diabetes and Parkinson datasets. | Not mentioned. | The extension is planned with other ML algorithms. Verification of multi-class classification is planned. |
| DeepDDoS: A Deep-Learning Model for Detecting Software Defined Healthcare IoT Networks Attacks | Performance tests, Model Efficiency and Processing Time were evaluated. The CICDDoS2019 dataset (12 DDoS attack types in two classes) was used for evaluation. The monitored metric was accuracy. | Not mentioned. | The authors plan to simulate more WebDDoS attacks and other types. The plan is to use the Deep belief network of Boltzmann Machines to avoid false alarm detection. |
| Detection and Mitigation of Man-in-the-Middle Attack in IoT through Alternate Routing | The healthcare dataset was used for testing. The data was sent from the client through the intermediate server, and modified data reached the server. The attack was detected. | Not mentioned. | The framework can be extended to detect other types of attacks (for example, Denial of Service). |
| Embedded policing and policy enforcement approach for future secure IoT technologies | A preliminary use case was used. SPE was integrated between devices and Advanced eXtensive Interface (AXI4) and either grants or refuses access. | Not mentioned. Preliminary proof-of-concept. | Future work will focus on providing isolation and segregation of hardware resources requested by software. Ensure configuration of hardware components and oversight for more complex communication attributes. |
| Enabling Security Services in Socially Assistive Robot Scenarios for Healthcare Applications | The evaluation was performed in the structure: Data collection and Probe validation by multiple measurements on QTrobot, Anomaly Detection, Validation of Predictive Analytics and Risk Assessment Services, Predictive Data Analysis and Stakeholder Feedback Evaluation with User Experience Questionnaire (UEQ) | Not mentioned. | Need of highly programmable security services that can be easily deployed and integrated with IoT environments. Using SECaaS programming support services for the protection of the interaction between patients and Qtrobot. |
| Enhancing Data Privacy of IoT Healthcare with Keylogger Attack Mitigation | The IoT healthcare dataset was used for comparing the performance of machine learning models. | Not mentioned. | Not mentioned. |
| Extreme learning machine and bayesian optimization‑driven intelligent framework for IoMT cyber‑attack detection | Performance was evaluated by comparing the results with other machine learning approaches and ensemble learning approaches. The result shows better efficiency of the proposed model. | ELM works for few learned patterns and may fail for larger nonlinear data approximation-based solutions. | Future work should focus on security and privacy concerns of multiple cloud/fog-based environments with extensive devices. To overcome limitations for larger-sized nonlinear data approximation based solutions, the adoption of a deep learning neural network with learning capability for untrained features is advised. |
| Hybrid dual-channel convolution neural network (DCCNN) with spider monkey optimization (SMO) for cyber security threats detection in internet of things | A dataset by Google code jam was collected. One hundred programmers source code files for testing. The result is that this method brings better categorization. | Not mentioned. | Inspection of the efficiency of the proposed work and expansion of the technique for identification of spyware are planned. |
| IDS-Chain: A Collaborative Intrusion Detection Framework Empowered Blockchain for Internet of Medical Things | Not mentioned. | It is required to develop a method to solve the increasing number of participants from the point of view of bootstrap time. Involving blockchain makes store and computing loading more difficult. A lightweight detection-enabled blockchain is required. Blockchain transactions may take a long time, and latency, until parties update their ledgers, can be an opportunity for intrusion. | The work will be expanded to include experimental results based on real IoMT data. |
| Improved Wireless Medical Cyber-Physical System (IWMCPS) Based on Machine Learning | The evaluation was performed for data modification and injection. It was based on delay analysis, simulation outcome analysis, computation time analysis, and efficiency analysis. | Current data length is limited. | The authors plan the application of the model in faked classification tasks using deep neural networks for speed performance. Solving of limited data size is planned. |
| IoMT-SAF: Internet of Medical Things Security Assessment Framework | Cybersecurity experts evaluated the Recommendations module. The experts declined to participate in the assessment of the Assessment module. A Survey-based assessment was conducted by 32 cybersecurity specialists and 18 healthcare specialists. Overall satisfaction was 3.9 on a Likert scale (1 to 5, with five being strongly agreed). | Lengthy definition of security profiles (260 questions). However, the application uses scenario-based filtering of attribute lists and automatic retrieval of common answers to facilitate the completion of profiles. | The authors plan to involve IoMT solution providers in the process of defining security. Users could request responses to attributes evaluated electronically. Explore the possibility of defining solution profiles and integrating them with crowdsourcing platforms (e.g. Amazon Mechanical Turk). Developing a dashboard for solution providers to answer attribute ratings, see user requests and compare their products with others. |
| IoT cyber risk: a holistic analysis of cyber risk assessment frameworks, risk vectors, and risk ranking process | Not mentioned. | Not mentioned. | Not mentioned. |
| IOT SECURITY RISK MANAGEMENT MODEL FOR HEALTHCARE INDUSTRY | The model is evaluated with three IoT experts and two healthcare IT practitioners by using a System Usability Score (SUS) questionnaire. The result is "good usability". | Not mentioned. | Not mentioned. |
| IoT Security Risk Management Model for Secured Practice in Healthcare Environment | Not mentioned. | Not mentioned. | Evaluation of the model by IoT experts is planned. |
| ISA Evaluation Framework for Security of Internet of Health Things System Using AHP-TOPSIS Methods | Not mentioned. | Not mentioned. | The authors plan to extend the framework to include more safety requirements, alternatives and other multi-criteria decision-making approaches. |
| Mitigating the Impact of IoT Routing Attacks on Power Consumption in IoT Healthcare Environment using Convolutional Neural Network | The model was validated by experiments. The experimental results are based on the Cooja simulator and RapidMiner and show that IoT routing attacks can be detected with high-performance metrics that affect power consumption. | Not mentioned. | Modification of convolution neural network algorithm because of the long-time training process is planned. |
| MODSC: Many-objective Optimization-driven Data-balancing Strategy in Cross-Architectural Malware Classification for Extreme IoT | The method was validated by testing six architectures on a group of malware datasets. Different types of control experimental groups were used to evaluate the effectiveness. | Not mentioned. | Future work will focus on the balancing strategy generation process to simplify and improve the ease of use of the framework. |
| Novel Multi Security and Privacy Benchmarking Framework for Blockchain-Based IoT Healthcare Industry 4.0 Systems | The framework was evaluated by using sensitivity analysis. | The evaluation criteria were presented based on two categorical scales only. The importance measurement reflected preference was not considered. S-FWZIC was prepared with a single aggregation operator. | The authors mentioned several future directions; for example, evaluation criteria can be assessed based on Likert scales; S-FWZIC can be formulated with other aggregation operators; the framework can be used in different categories; integration of other multicriteria decision-making ranking methods. |
| PHASE: Security Analyzer for Next-Generation Smart Personalized Smart Healthcare System | Different datasets (PIMA Indians diabetes dataset, AIM-94 dataset and Harvard Dataverse blood pressure datasets) were used for experiments and validation. | An attacker having complete knowledge of the SHS architecture and the measurement verification process can still attack and misinform the controller. The low sampling time for control signal generation for some sensor measurements. Measurement manipulations are limited to the sensor level. | Cooperation with domain experts to model Knowledge base rules is mentioned. Future extensions will consider the reliability of predicted measurements to reduce vulnerable samples and contribute to more SHS robustness. Verification rules will be modified to reduce vulnerable samples. |
| Resilient Security Framework Using TNN and Blockchain for IoMT | For validation of performance dataset ICUDatasetProcessed was used based on an Intensive Care Unit scenario. An open-source tool IoT-Flock, generated IoT synthetic traffic. Results are presented on the F1-score metric. | The proposed blockchain-based solution does not concentrate on performance. | The planned work is to evaluate the system's performance. |
| Security as solution: An Intrusion Detection System Using a Neural Network For IoT Enabled Healthcare Ecosystem | For validation of prediction, an experimental application simulation was performed. | Not mentioned. | The application can be enhanced by adding other modules, for example, for data privacy (authentication and authorisation). It can be used for other environments (for example, e-homes). |
| The internet of things in healthcare: an overview, challenges and model plan for security risks management process | Not mentioned. | Not mentioned. The article describes the current status of the proposed framework, which is in the preliminary and design phases. | The model will be updated after receiving feedback from IT and business personnel in the hospital. The model is expected to be implemented in other hospitals in Malaysia. |
| Threat and Risk Management Framework for eHealth IoT Applications | Not mentioned. | Not mentioned. The article describes the current status of proposed framework development. A reference architecture will be developed. The current status covers only high-level details. | Next steps of development of the framework. For example, feature space modelling for security and privacy threat assessment, risk-driven scoring of features and configuration, and development of a prototype implementation. |
| Towards a Framework for Testing the Security of IoT Devices Consistently | The framework was evaluated by testing three devices: a router, a baby monitor and a security system. | Not mentioned. | Extension mappings for remaining attack surfaces. |
| Towards a Novel Framework for Reinforcing Cybersecurity using Digital Twins in IoT-based Healthcare Applications | Not mentioned. | Not mentioned. | The development of an ethical method for digital twins is planned. The authors also plan to evaluate the effectiveness of the framework. |
| Trustworthy Intrusion Detection in E-Healthcare Systems | For experiments, dataset KDDcup 99 was used. | Not mentioned. | Not mentioned. |
| TSDroid: A Novel Android Malware Detection Framework Based on Temporal & Spatial Metrics in IoMT | The framework was evaluated using different methods (Drebin, HinDroid, DroisEvolver) on three standard malware datasets (Drebin, VirusShare and AMD). | Not mentioned. | Planned future work combines dynamic and static analysis to find out characteristics at runtime to detect Android malware. |
